# Supplementary material for: Antibiotic Prescriptions among China Ambulatory Care Visits of Pregnant Women: A Nationwide Cross-Sectional Study
Source: MDPI journal article supplement (doi:10.3390/antibiotics10050601), 2021-05-19
Supplement: s1 [file s1]

## Appendix Table of Contents

**Table S1. Number of included and excluded hospitals in different subgroups.**

**Table S2. Outpatient visits in included and excluded hospitals for various subgroups.**

**Table S3. Antibiotics prescribed for pregnant women and the categories.**

**Table S4. Percentages of Antibiotic prescriptions during pregnancy by age group and diagnosis.**

**Figure S1. Use of broad-spectrum antibiotics for different diagnosis categories.**

**Table S5. Prescription proportions of all antibiotic agents used by pregnant women**

### Appendix: Comparisons between the included and excluded hospitals in this study

Direct comparison of outpatient visits of pregnant women between the included and excluded hospitals was infeasible due to lack of diagnosis information in the excluded hospitals. Table S1 shows the numbers of included and excluded hospitals in different subgroups. Table S2 gives the outpatient visits in included and excluded hospitals for various subgroups. We used standardized mean difference, which represents small difference if the value is less than 0.2 [1], to indicate the significance of the difference between included and excluded hospitals. The results in the Table S1 and Table S2 indicated that there were no significant differences between the included and excluded hospitals except that more outpatient visits from the Central region were excluded due to lack of diagnosis information.

**Table S1. Number of included and excluded hospitals in different subgroups**

| Subgroups        | Hospitals included |                             | Hospitals excluded |                             | Standardized mean difference |
|------------------|--------------------|-----------------------------|--------------------|-----------------------------|------------------------------|
|                  | No. of hospitals   | Proportion of hospitals (%) | No. of hospitals   | Proportion of hospitals (%) |                              |
| Overall          | 128                | 100.0                       | 66                 | 100.0                       | —                            |
| Hospital level   |                    |                             |                    |                             | 0.1428                       |
| 2                | 38                 | 29.7                        | 24                 | 36.4                        |                              |
| 3                | 90                 | 70.3                        | 42                 | 63.6                        |                              |
| Regions of China |                    |                             |                    |                             | 0.0902                       |
| Eastern          | 53                 | 41.4                        | 25                 | 37.9                        |                              |
| Central          | 18                 | 14.1                        | 11                 | 16.7                        |                              |
| Western          | 41                 | 32.0                        | 22                 | 33.3                        |                              |
| Northeastern     | 16                 | 12.5                        | 8                  | 12.1                        |                              |

**Table S2. Outpatient visits in included and excluded hospitals for various subgroups**

| Subgroups          | All visits, n (%) <sup>a</sup> |                    |                              | Visits with antibiotics, n(%) <sup>b</sup> |                    |                              |
|--------------------|--------------------------------|--------------------|------------------------------|--------------------------------------------|--------------------|------------------------------|
|                    | Hospitals included             | Hospitals excluded | Standardized mean difference | Hospitals included                         | Hospitals excluded | Standardized mean difference |
| Overall            | 168493940 (100.0)              | 70117632 (100.0)   |                              | 18479758 (11.0)                            | 7127483 (10.2)     | 0.0261                       |
| Age group          |                                |                    | 0.1161                       |                                            |                    |                              |
| 0-5                | 7937454 (4.7)                  | 3502089 (5.0)      |                              | 1957015 (24.7)                             | 775446 (22.1)      | 0.0594                       |
| 6-17               | 7911049 (4.7)                  | 3462146 (4.9)      |                              | 1298530 (16.4)                             | 513705 (14.8)      | 0.0434                       |
| 18-44              | 73867993 (43.8)                | 33986228 (48.5)    |                              | 8804288 (11.9)                             | 3707749 (10.9)     | 0.0317                       |
| 45-64              | 51505516 (30.6)                | 19390844 (27.7)    |                              | 4167463 (8.1)                              | 1488537 (7.7)      | 0.0154                       |
| ≥65                | 26594201 (15.8)                | 9690694 (13.8)     |                              | 2194782 (8.3)                              | 632176 (6.5)       | 0.0661                       |
| Unknown            | 677727 (0.4)                   | 85631 (0.1)        |                              | 57680 (8.5)                                | 9870 (11.5)        | 0.1006                       |
| Gender of patients |                                |                    | 0.0177                       |                                            |                    |                              |
| Female             | 87664917 (52.0)                | 35868609 (51.2)    |                              | 8307515 (9.5)                              | 3225126 (9.0)      | 0.0168                       |
| Male               | 80671932 (47.9)                | 34176480 (48.7)    |                              | 10151864 (12.6)                            | 3898969 (11.4)     | 0.0362                       |
| Unknown            | 157091 (0.1)                   | 72543 (0.1)        |                              | 20379 (13.0)                               | 3388 (4.7)         | 0.2959                       |
| Type of patients   |                                |                    | 0.0149                       |                                            |                    |                              |
| Emergency          | 13478129 (8.0)                 | 5327936 (7.6)      |                              | 4042328 (30.0)                             | 1278337 (24.0)     | 0.1354                       |
| Outpatient         | 155015811 (92.0)               | 64789696 (92.4)    |                              | 14437430 (9.3)                             | 5849146 (9.0)      | 0.0099                       |
| Hospital level     |                                |                    | 0.0262                       |                                            |                    |                              |
| Secondary          | 13218795 (7.8)                 | 6005674 (8.6)      |                              | 1679655 (12.7)                             | 735531 (12.2)      | 0.0139                       |
| Tertiary           | 155275145 (92.2)               | 64111958 (91.4)    |                              | 16800103 (10.8)                            | 6391952 (10.0)     | 0.0278                       |
| Regions of China   |                                |                    | 0.4592                       |                                            |                    |                              |
| Eastern            | 94717757 (56.2)                | 36856158 (52.6)    |                              | 11761093 (12.4)                            | 4166081 (11.3)     | 0.0344                       |
| Central            | 9149698 (5.4)                  | 12961475 (18.5)    |                              | 1039203 (11.4)                             | 1492795 (11.5)     | 0.0050                       |
| Western            | 48431349 (28.7)                | 17641749 (25.2)    |                              | 4323362 (8.9)                              | 1296869 (7.4)      | 0.0576                       |

|               |                 |                 |        |                |                |        |
|---------------|-----------------|-----------------|--------|----------------|----------------|--------|
| Northeastern  | 16195136 (9.6)  | 2658250 (3.8)   |        | 1356100 (8.4)  | 171738 (6.5)   | 0.0730 |
| Year of visit |                 |                 | 0.0455 |                |                |        |
| 2014          | 11547018 (6.9)  | 5243222 (7.5)   |        | 1486769 (12.9) | 605392 (11.5)  | 0.0406 |
| 2015          | 48417915 (28.7) | 21113692 (30.1) |        | 5518078 (11.4) | 2213170 (10.5) | 0.0293 |
| 2016          | 48077338 (28.5) | 19813112 (28.3) |        | 5170057 (10.8) | 1970710 (9.9)  | 0.0265 |
| 2017          | 46878388 (27.8) | 18556863 (26.5) |        | 4851011 (10.3) | 1793869 (9.7)  | 0.0227 |
| 2018          | 13573281 (8.1)  | 5390743 (7.7)   |        | 1453843 (10.7) | 544342 (10.1)  | 0.0201 |

<sup>a</sup> Percentages in the parentheses are the proportions of outpatient visits within each subgroup.

<sup>b</sup> Percentages in the parentheses are the percentages of outpatient visits ended with antibiotic prescriptions.

**Table S3. Antibiotics prescribed for pregnant women and the categories**

| <b>Antibiotic categories</b>                             | <b>Antibiotics</b>                                                                                                                                                                                                                                                                                                                                                                                                                                                                                     |
|----------------------------------------------------------|--------------------------------------------------------------------------------------------------------------------------------------------------------------------------------------------------------------------------------------------------------------------------------------------------------------------------------------------------------------------------------------------------------------------------------------------------------------------------------------------------------|
| <b>FDA Pregnancy Category B</b>                          |                                                                                                                                                                                                                                                                                                                                                                                                                                                                                                        |
| Beta-lactam antibacterials, penicillins                  | Amoxicillin, Amoxicillin-clavulanate, Amoxicillin-dicloxacillin, Amoxicillin-flucloxacillin, Amoxicillin-sulbactam, Ampicillin, Ampicillin-probenecid, Azlocillin, Benzathine benzylpenicillin, Benzylpenicillin, Flucloxacillin, Lenampicillin, Mezlocillin, Mezlocillin-sulbactam, Phenoxymethylpenicillin, Piperacillin, Piperacillin-sulbactam, Piperacillin-tazobactam, Sulbenicillin, Sultamicillin, Ticarcillin-clavulanate                                                                     |
| Monobactams and cephalosporins                           | Aztreonam, Cefaclor, Cefadroxil, Cefalexin, Cefalotin, Cefamandole, Cefathiamidine, Cefazedone, Cefazolin, Cefdinir, Cefepime, Cefetamet, Cefixime, Cefmenoxime, Cefmetazole, Cefminox, Cefodizime, Cefonicid, Cefoperazone, Cefoperazone-sulbactam, Cefoperazone-tazobactam, Cefotaxime, Cefotaxime-sulbactam, Cefotiam, Cefoxitin, Cefpiramide, Cefpodoxime, Cefprozil, Cefradine, Ceftazidime, Cefteram pivoxil, Ceftezole, Ceftizoxime, Ceftriaxone, Ceftriaxone-tazobactam, Cefuroxime, Latamoxef |
| Carbapenems                                              | Meropenem                                                                                                                                                                                                                                                                                                                                                                                                                                                                                              |
| Macrolides and lincosamides                              | Azithromycin, Clindamycin, Dirithromycin, Erythromycin, Erythromycin cyclocarbonate, Erythromycin ethylsuccinate, Roxithromycin, Lincomycin                                                                                                                                                                                                                                                                                                                                                            |
| Imidazole derivatives                                    | Metronidazole                                                                                                                                                                                                                                                                                                                                                                                                                                                                                          |
| Other antibiotics                                        | Fosfomycin, Nitrofurantoin, Vancomycin                                                                                                                                                                                                                                                                                                                                                                                                                                                                 |
| <b>FDA Pregnancy Category C</b>                          |                                                                                                                                                                                                                                                                                                                                                                                                                                                                                                        |
| Carbapenems                                              | Imipenem-cilastatin                                                                                                                                                                                                                                                                                                                                                                                                                                                                                    |
| Sulfonamides and trimethoprim                            | Sulfamethoxazole-trimethoprim                                                                                                                                                                                                                                                                                                                                                                                                                                                                          |
| Macrolides and lincosamides                              | Clarithromycin                                                                                                                                                                                                                                                                                                                                                                                                                                                                                         |
| Quinolones                                               | Antofloxacin, Ciprofloxacin, Enoxacin, Fleroxacin, Gatifloxacin, Levofloxacin, Moxifloxacin, Norfloxacin, Ofloxacin, Pazufloxacin, Pipemidic acid, Sparfloxacin                                                                                                                                                                                                                                                                                                                                        |
| Imidazole derivatives                                    | Tinidazole                                                                                                                                                                                                                                                                                                                                                                                                                                                                                             |
| Other antibiotics                                        | Cefalexin-trimethoprim, Linezolid                                                                                                                                                                                                                                                                                                                                                                                                                                                                      |
| <b>FDA Pregnancy Category D</b>                          |                                                                                                                                                                                                                                                                                                                                                                                                                                                                                                        |
| Tetracyclines                                            | Doxycycline, Minocycline, Tetracycline, Tigecycline                                                                                                                                                                                                                                                                                                                                                                                                                                                    |
| Aminoglycosides                                          | Amikacin, Etimicin, Gentamicin, Isepamicin, Streptomycin                                                                                                                                                                                                                                                                                                                                                                                                                                               |
| <b>Category N: not be assigned with any FDA Category</b> |                                                                                                                                                                                                                                                                                                                                                                                                                                                                                                        |
| Macrolides                                               | Kitasamycin                                                                                                                                                                                                                                                                                                                                                                                                                                                                                            |
| Carbapenems                                              | Biapenem, Faropenem                                                                                                                                                                                                                                                                                                                                                                                                                                                                                    |
| Other antibiotics                                        | Ornidazole, Levornidazole, Thiamphenicol                                                                                                                                                                                                                                                                                                                                                                                                                                                               |

**Table S4. Percentages of Antibiotic prescriptions during pregnancy by age group and diagnosis**

| Diagnosis categories*                                                | 18-25 years                                     |                                                       | 26-35 years                                     |                                                       | >35 years                                       |                                                       |
|----------------------------------------------------------------------|-------------------------------------------------|-------------------------------------------------------|-------------------------------------------------|-------------------------------------------------------|-------------------------------------------------|-------------------------------------------------------|
|                                                                      | Outpatient visits (with antibiotics/all visits) | Antibiotic prescription rate in pregnancy, % (95% CI) | Outpatient visits (with antibiotics/all visits) | Antibiotic prescription rate in pregnancy, % (95% CI) | Outpatient visits (with antibiotics/all visits) | Antibiotic prescription rate in pregnancy, % (95% CI) |
| <b>Tier 1 diagnoses that antibiotics are almost always indicated</b> |                                                 |                                                       |                                                 |                                                       |                                                 |                                                       |
| Pneumonia                                                            | 27/47                                           | 57.45 (42.18-71.74)                                   | 108/194                                         | 55.67 (48.38-62.78)                                   | 35/53                                           | 66.04 (51.73-78.48)                                   |
| Urinary tract infections                                             | 435/1245                                        | 34.94 (32.29-37.66)                                   | 1031/3422                                       | 30.13 (28.59-31.70)                                   | 169/496                                         | 34.07 (29.91-38.43)                                   |
| Certain bacterial diseases                                           | 882/1834                                        | 48.09 (45.78-50.41)                                   | 2034/4301                                       | 47.29 (45.79-48.80)                                   | 371/824                                         | 45.02 (41.59-48.49)                                   |
| Other bacterial infections                                           | 3711/8572                                       | 43.29 (42.24-44.35)                                   | 4326/11523                                      | 37.54 (36.66-38.43)                                   | 1184/2931                                       | 40.40 (38.61-42.20)                                   |
| All tier 1 diagnoses                                                 | 5055/11698                                      | 43.21 (42.31-44.12)                                   | 7499/19440                                      | 38.58 (37.89-39.26)                                   | 1759/4304                                       | 40.87 (39.40-42.36)                                   |
| <b>Tier 2 diagnoses that antibiotics are sometimes indicated</b>     |                                                 |                                                       |                                                 |                                                       |                                                 |                                                       |
| COPD                                                                 | 0/4                                             | 0.0 (0.0-60.24)                                       | 2/18                                            | 11.11 (1.38-34.71)                                    | 1/18                                            | 5.56 (0.14-27.29)                                     |
| Acute sinusitis                                                      | 10/21                                           | 47.62 (25.71-70.22)                                   | 72/183                                          | 39.34 (32.22-46.82)                                   | 17/58                                           | 29.31 (18.09-42.73)                                   |
| Acute pharyngitis                                                    | 104/271                                         | 38.38 (32.56-44.45)                                   | 565/1613                                        | 35.03 (32.70-37.41)                                   | 112/395                                         | 28.35 (23.96-33.08)                                   |
| Acute otitis media                                                   | 7/30                                            | 23.33 (9.93-42.28)                                    | 29/132                                          | 21.97 (15.23-30.00)                                   | 7/19                                            | 36.84 (16.29-61.64)                                   |
| Other infectious diseases of the respiratory system                  | 120/359                                         | 33.43 (28.56-38.57)                                   | 511/1582                                        | 32.30(30.00-34.67)                                    | 139/387                                         | 35.92 (31.13-40.92)                                   |
| Infectious diseases of oral cavity and salivary glands               | 53/302                                          | 17.55 (13.43-22.32)                                   | 281/1446                                        | 19.43 (17.42-21.57)                                   | 40/218                                          | 18.35 (13.44-24.14)                                   |
| Infectious gastroenteritis                                           | 20/183                                          | 10.93 (6.80-16.37)                                    | 77/567                                          | 13.58 (10.87-16.68)                                   | 16/76                                           | 21.05 (12.54-31.92)                                   |

|                                                                 |            |                     |            |                     |            |                     |
|-----------------------------------------------------------------|------------|---------------------|------------|---------------------|------------|---------------------|
| Other infectious diseases of the digestive system               | 9/100      | 9.00 (4.20-16.40)   | 31/333     | 9.31 (6.41-12.95)   | 8/77       | 10.39 (4.59-19.45)  |
| Acne                                                            | 19/127     | 14.96 (9.25-22.37)  | 33/335     | 9.85 (6.88-13.56)   | 3/43       | 6.98 (1.46-19.06)   |
| Impetigo                                                        | 0/2        | 0.0 (0.0-84.19)     | 2/10       | 20.00 (2.52-55.61)  | 0/1        | 0.0 (0.0-97.50)     |
| Other skin, cutaneous, and mucosal infections                   | 14/135     | 10.37 (5.79-16.79)  | 104/832    | 12.50 (10.33-14.94) | 26/147     | 17.69 (11.89-24.83) |
| Other infectious diseases that antibiotic may be indicated      | 1943/20660 | 9.4 0(9.01-9.81)    | 3312/67360 | 4.92 (4.75-5.08)    | 903/11121  | 8.12 (7.62-8.64)    |
| All tier 2 diagnoses                                            | 2299/22194 | 10.36 (9.96-10.77)  | 5019/74411 | 6.74 (6.57-6.93)    | 1272/12560 | 10.13 (9.61-10.67)  |
| <b>Tier 3 diagnoses that antibiotics are not indicated</b>      |            |                     |            |                     |            |                     |
| Viral infections                                                | 10/1607    | 0.62 (0.30-1.14)    | 19/5406    | 0.35 (0.21-0.55)    | 4/625      | 0.64 (0.17-1.63)    |
| Fungal infections                                               | 7/352      | 1.99 (0.80-4.05)    | 22/1118    | 1.97 (1.24-2.96)    | 6/184      | 3.26 (1.21-6.96)    |
| Non-suppurative otitis media                                    | 2/10       | 20.00 (2.52-55.61)  | 15/69      | 21.74 (12.71-33.31) | 4/12       | 33.33 (9.92-65.11)  |
| Viral upper respiratory tract infection (URTI)                  | 448/1427   | 31.39 (28.99-33.87) | 1932/6284  | 30.74 (29.61-31.90) | 428/1273   | 33.62 (31.03-36.29) |
| Influenza                                                       | 0/2        | 0.0 (0.0-84.19)     | 0/7        | 0.0 (0.0-40.96)     |            |                     |
| Acute bronchitis                                                | 92/231     | 39.83 (33.46-46.45) | 723/1625   | 44.49 (42.06-46.95) | 153/321    | 47.66 (42.09-53.28) |
| Allergy and asthma                                              | 15/253     | 5.93 (3.36-9.59)    | 58/1260    | 4.60 (3.51-5.91)    | 9/266      | 3.38(1.56-6.33)     |
| Cough                                                           | 12/133     | 9.02 (4.75-15.23)   | 138/916    | 15.07 (12.81-17.55) | 29/191     | 15.18 (10.41-21.07) |
| Other non-infectious gastroenteritis                            | 62/660     | 9.39 (7.28-11.88)   | 209/2106   | 9.92 (8.68-11.28)   | 33/373     | 8.85 (6.17-12.20)   |
| Non-specific symptoms, signs of respiratory system <sup>b</sup> | 7/126      | 5.56 (2.26-11.11)   | 25/388     | 6.44 (4.21-9.36)    | 9/78       | 11.54 (5.41-20.78)  |

|                                                  |              |                     |               |                     |              |                     |
|--------------------------------------------------|--------------|---------------------|---------------|---------------------|--------------|---------------------|
| Non-specific symptoms, signs of digestive system | 83/1646      | 5.04 (4.04-6.21)    | 132/4017      | 3.29 (2.76-3.88)    | 32/546       | 5.86 (4.04-8.17)    |
| Fever                                            | 108/362      | 29.83(25.16-34.84)  | 250/906       | 27.59 (24.70-30.63) | 35/97        | 36.08 (26.58-46.46) |
| Procedures and surgeries not included elsewhere  | 123/1019     | 12.07 (10.13-14.23) | 161/5993      | 2.69 (2.29-3.13)    | 60/1252      | 4.79 (3.68-6.13)    |
| All other conditions not listed above            | 19057/815646 | 2.34 (2.30-2.37)    | 34359/3108290 | 1.11 (1.09-1.12)    | 10740/463277 | 2.32 (2.28-2.36)    |
| All tier 3 diagnoses                             | 20026/823474 | 2.43 (2.40-2.47)    | 38043/3138385 | 1.21 (1.20-1.22)    | 11542/468495 | 2.46 (2.42-2.51)    |
| All conditions                                   | 27380/857366 | 3.19 (3.16-3.23)    | 50561/3232236 | 1.56 (1.55-1.58)    | 14573/485359 | 3.00 (2.95-3.05)    |

\*Tier 1 diagnoses are conditions for which antibiotic is almost always indicated, such as pneumonia; tier 2 diagnoses are conditions for which antibiotic may be indicated, such as sinusitis; finally tier 3 diagnosis are all other conditions for which antibiotic is almost never indicated.

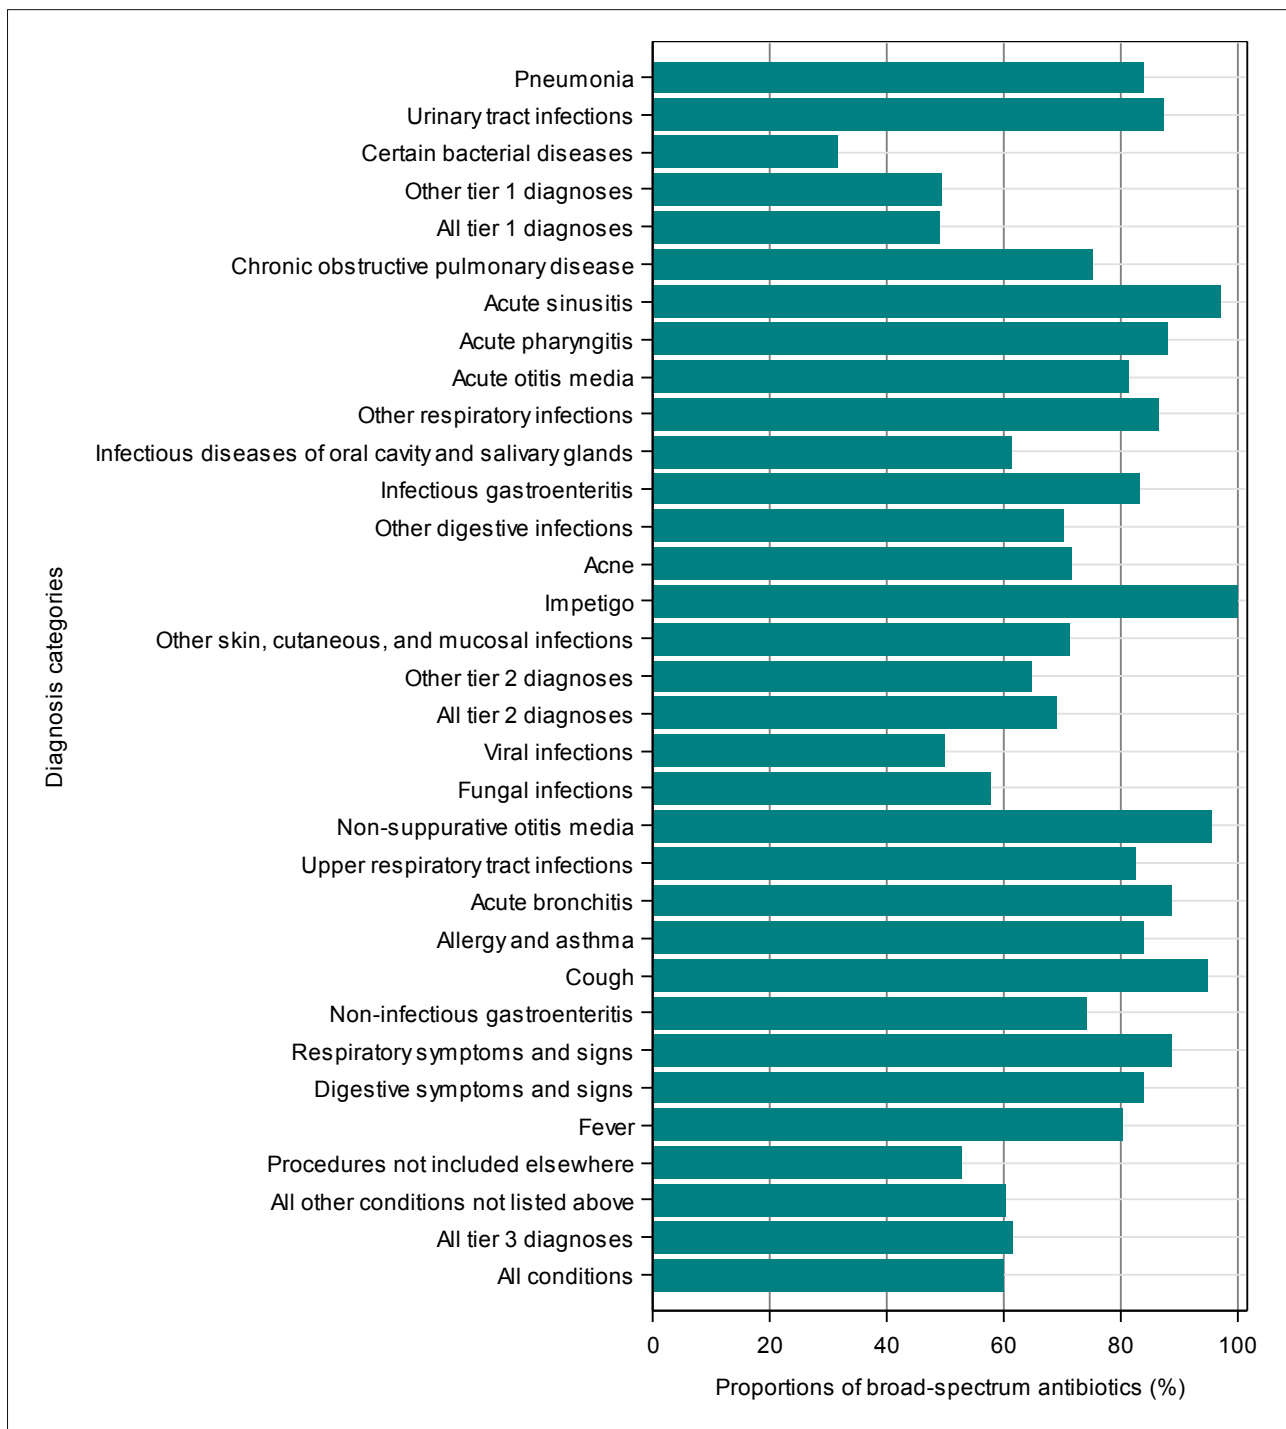

**Figure S1. Use of broad-spectrum antibiotics for different diagnosis categories**

**Table S5. Prescription proportions of all antibiotic agents used by pregnant women**

| <b>Antibiotics</b>              | <b>Prescription frequency</b> | <b>Proportion of prescribing within categories, %</b> | <b>Proportion of prescribing among all antibiotics, %</b> |
|---------------------------------|-------------------------------|-------------------------------------------------------|-----------------------------------------------------------|
| <b>FDA Pregnancy Category B</b> |                               |                                                       |                                                           |
| Azithromycin                    | 11055                         | 14.05                                                 | 8.48                                                      |
| Cefixime                        | 10267                         | 13.05                                                 | 7.88                                                      |
| Cefdinir                        | 10140                         | 12.89                                                 | 7.78                                                      |
| Metronidazole                   | 9202                          | 11.69                                                 | 7.06                                                      |
| Cefuroxime                      | 5868                          | 7.46                                                  | 4.50                                                      |
| Cefaclor                        | 3371                          | 4.28                                                  | 2.59                                                      |
| Amoxicillin                     | 3273                          | 4.16                                                  | 2.51                                                      |
| Clindamycin                     | 2968                          | 3.77                                                  | 2.28                                                      |
| Benzylpenicillin                | 2716                          | 3.45                                                  | 2.08                                                      |
| Cefprozil                       | 2141                          | 2.72                                                  | 1.64                                                      |
| Cefamandole                     | 1687                          | 2.14                                                  | 1.29                                                      |
| Amoxicillin-clavulanate         | 1609                          | 2.04                                                  | 1.23                                                      |
| Benzathine benzylpenicillin     | 1535                          | 1.95                                                  | 1.18                                                      |
| Cefmetazole                     | 1192                          | 1.51                                                  | 0.91                                                      |
| Cefradine                       | 1137                          | 1.44                                                  | 0.87                                                      |
| Erythromycin                    | 981                           | 1.25                                                  | 0.75                                                      |
| Aztreonam                       | 953                           | 1.21                                                  | 0.73                                                      |
| Ceftriaxone                     | 942                           | 1.2                                                   | 0.72                                                      |
| Cefalexin                       | 848                           | 1.08                                                  | 0.65                                                      |
| Fosfomycin                      | 822                           | 1.04                                                  | 0.63                                                      |
| Sultamicillin                   | 538                           | 0.68                                                  | 0.41                                                      |
| Roxithromycin                   | 473                           | 0.6                                                   | 0.36                                                      |
| Cefazolin                       | 414                           | 0.53                                                  | 0.32                                                      |
| Cefpodoxime                     | 375                           | 0.48                                                  | 0.29                                                      |
| Dirithromycin                   | 322                           | 0.41                                                  | 0.25                                                      |
| Cefoxitin                       | 313                           | 0.4                                                   | 0.24                                                      |
| Ceftazidime                     | 312                           | 0.4                                                   | 0.24                                                      |
| Sulbenicillin                   | 284                           | 0.36                                                  | 0.22                                                      |
| Cefodizime                      | 269                           | 0.34                                                  | 0.21                                                      |
| Cefoperazone                    | 245                           | 0.31                                                  | 0.19                                                      |
| Cefathiamidine                  | 211                           | 0.27                                                  | 0.16                                                      |
| Amoxicillin-sulbactam           | 202                           | 0.26                                                  | 0.16                                                      |

|                             |     |       |       |
|-----------------------------|-----|-------|-------|
| Cefotiam                    | 194 | 0.25  | 0.15  |
| Cefoperazone-sulbactam      | 185 | 0.24  | 0.14  |
| Amoxicillin-flucloxacillin  | 157 | 0.2   | 0.12  |
| Lincomycin                  | 146 | 0.19  | 0.11  |
| Cefotaxime                  | 140 | 0.18  | 0.11  |
| Piperacillin-sulbactam      | 115 | 0.15  | 0.09  |
| Phenoxymethylpenicillin     | 112 | 0.14  | 0.09  |
| Cefminox                    | 110 | 0.14  | 0.08  |
| Cefadroxil                  | 108 | 0.14  | 0.08  |
| Cefepime                    | 93  | 0.12  | 0.07  |
| Ceftizoxime                 | 87  | 0.11  | 0.07  |
| Flucloxacillin              | 83  | 0.11  | 0.06  |
| Cefoperazone-tazobactam     | 74  | 0.09  | 0.06  |
| Ceftriaxone-tazobactam      | 44  | 0.06  | 0.03  |
| Latamoxef                   | 41  | 0.05  | 0.03  |
| Piperacillin-tazobactam     | 35  | 0.04  | 0.03  |
| Mezlocillin-sulbactam       | 28  | 0.04  | 0.02  |
| Meropenem                   | 27  | 0.03  | 0.02  |
| Cefotaxime-sulbactam        | 26  | 0.03  | 0.02  |
| Cefalotin                   | 26  | 0.03  | 0.02  |
| Erythromycin ethylsuccinate | 26  | 0.03  | 0.02  |
| Cefteram pivoxil            | 22  | 0.03  | 0.02  |
| Ceftezole                   | 17  | 0.02  | 0.01  |
| Cefmenoxime                 | 16  | 0.02  | 0.01  |
| Nitrofurantoin              | 14  | 0.02  | 0.01  |
| Ampicillin-probenecid       | 13  | 0.02  | 0.01  |
| Azlocillin                  | 13  | 0.02  | 0.01  |
| Piperacillin                | 12  | 0.02  | 0.01  |
| Lenampicillin               | 10  | 0.01  | 0.01  |
| Ampicillin                  | 9   | 0.01  | 0.01  |
| Cefpiramide                 | 8   | 0.01  | 0.01  |
| Mezlocillin                 | 8   | 0.01  | 0.01  |
| Cefonicid                   | 7   | 0.01  | 0.01  |
| Erythromycin cyclocarbonate | 5   | 0.01  | <0.01 |
| Ticarclillin-clavulanate    | 5   | 0.01  | <0.01 |
| Cefetamet                   | 4   | 0.01  | <0.01 |
| Vancomycin                  | 4   | 0.01  | <0.01 |
| Amoxicillin-dicloxacillin   | 3   | <0.01 | <0.01 |

|                                                          |       |       |       |
|----------------------------------------------------------|-------|-------|-------|
| <b>FDA Pregnancy Category C</b>                          |       |       |       |
| Levofloxacin                                             | 13068 | 50.02 | 10.03 |
| Tinidazole                                               | 7796  | 29.84 | 5.98  |
| Clarithromycin                                           | 1497  | 5.73  | 1.15  |
| Enoxacin                                                 | 1374  | 5.26  | 1.05  |
| Ciprofloxacin                                            | 1264  | 4.84  | 0.97  |
| Moxifloxacin                                             | 455   | 1.74  | 0.35  |
| Ofloxacin                                                | 180   | 0.69  | 0.14  |
| Pazufloxacin                                             | 159   | 0.61  | 0.12  |
| Gatifloxacin                                             | 105   | 0.4   | 0.08  |
| Norfloxacin                                              | 97    | 0.37  | 0.07  |
| Fleroxacin                                               | 70    | 0.27  | 0.05  |
| Imipenem-cilastatin                                      | 33    | 0.13  | 0.03  |
| Antofloxacin                                             | 10    | 0.04  | 0.01  |
| Sulfamethoxazole-trimethoprim                            | 5     | 0.02  | <0.01 |
| Cefalexin-trimethoprim                                   | 4     | 0.02  | <0.01 |
| Pipemidic acid                                           | 4     | 0.02  | <0.01 |
| Linezolid                                                | 4     | 0.02  | <0.01 |
| Sparfloxacin                                             | 1     | <0.01 | <0.01 |
| <b>FDA Pregnancy Category D</b>                          |       |       |       |
| Etimicin                                                 | 2911  | 81.91 | 2.23  |
| Gentamicin                                               | 277   | 7.79  | 0.21  |
| Minocycline                                              | 145   | 4.08  | 0.11  |
| Doxycycline                                              | 127   | 3.57  | 0.10  |
| Amikacin                                                 | 63    | 1.77  | 0.05  |
| Tetracycline                                             | 25    | 0.7   | 0.02  |
| Isepamicin                                               | 4     | 0.11  | <0.01 |
| Tigecycline                                              | 1     | 0.03  | <0.01 |
| Streptomycin                                             | 1     | 0.03  | <0.01 |
| <b>Category N: not be assigned with any FDA Category</b> |       |       |       |
| Ornidazole                                               | 21642 | 98.66 | 16.61 |
| Levornidazole                                            | 134   | 0.61  | 0.10  |
| Kitasamycin                                              | 120   | 0.55  | 0.09  |
| Faropenem                                                | 29    | 0.13  | 0.02  |
| Thiamphenicol                                            | 6     | 0.03  | <0.01 |
| Biapenem                                                 | 5     | 0.02  | <0.01 |

## References

1. Yang D, Dalton J. A unified approach to measuring the effect size between two groups using SAS. SAS Global Forum 2012, 2012
